# Supplementary material for: A Regulatory Code for Neuron-Specific Odor Receptor Expression
Source: PLoS Biol. 2008 May 27;6(5):e125. doi: 10.1371/journal.pbio.0060125 (PMC2430909; doi:10.1371/journal.pbio.0060125)
Supplement: Figure S1 — (A) DOT-PLOT graphs of the 500-bp region upstream of indicated genes from two species. All diagonals 7 bp or greater are indicated. (B) Pairwise alignment of each species to the 500-bp upstream of each indicated D. melanogaster gene (400 bp for Or46a, up to the adjacent gene), generated from the UCSC genome browser. Grayscale density plots indicate conservation. Arrow indicates the position of ATG translation start site and direction of translation. Colored boxes indicate positions of the best-conserved motifs. Double lines in alignment indicate unalignable gaps. In the scale at the bottom of the panel, each tick represents 100 bp. On the right are the sequence alignments for the best-conserved gene-specific motifs for each Or gene. (C) Sequence alignments of the other gene-specific conserved motifs. The D. melanogaster 46a2 element is not shown because it occurs at a different position from those of D. pseudoobscura and D. persimilis. (469 KB PDF) [file pbio.0060125.sg001.pdf]

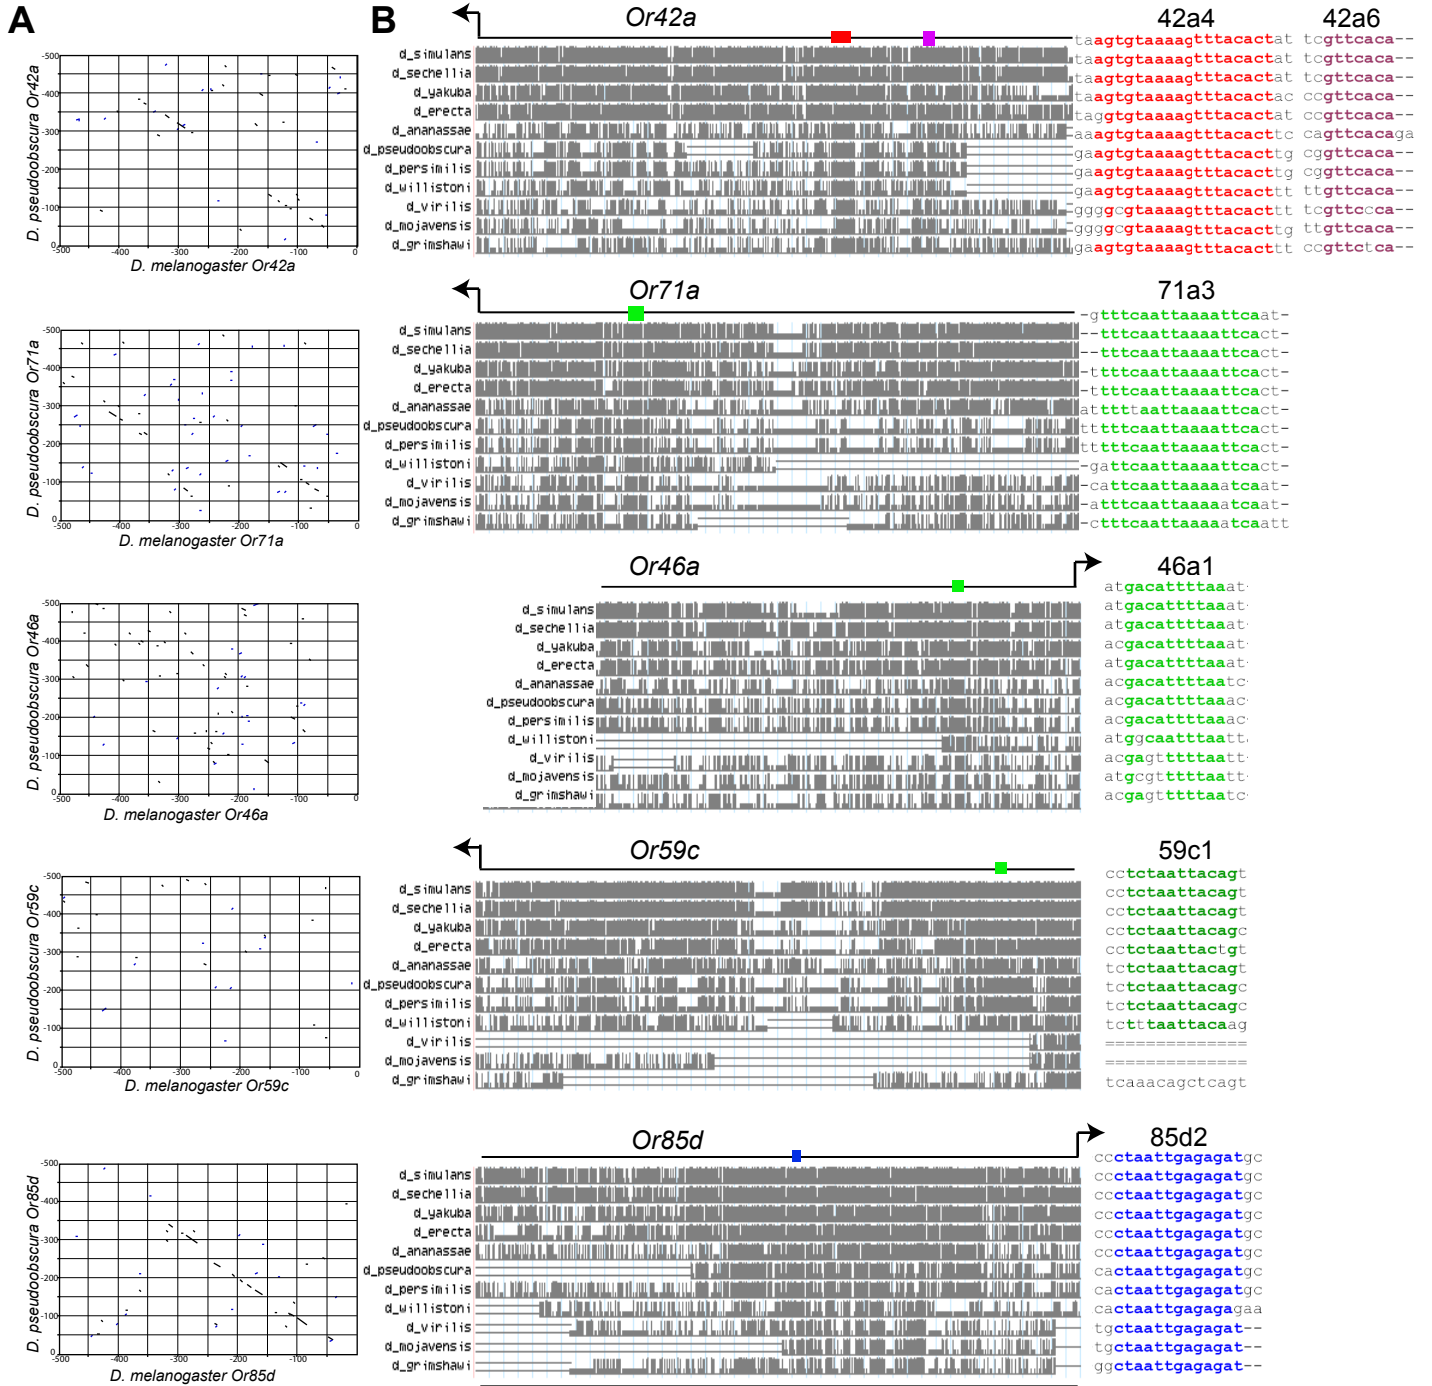

**C**

|                 | 42a1          | 42a2      | 42a3        | 42a5               | 71a1         | 71a2      | 46a2  | 85d1               |
|-----------------|---------------|-----------|-------------|--------------------|--------------|-----------|-------|--------------------|
| d_melanogaster  | aatggcgtgatta | ataattcat | aggcgacactt | aacagg-----ctgcaat | gattgcttaatt | aggggcgtt | ----- | -taatcaagtggcggtgc |
| d_simulans      | aatggcgtgatta | ataattcat | aggcgacactt | aacagg-----ctgcaat | gattgcttaatt | aggggcggt | ----- | -taatcaagtggcggtgc |
| d_sechellia     | aatggcgtgatta | ataattcat | aggcgacactt | aacagg-----ctgcaat | gattgcttaatt | aggggcggt | ----- | -taatcaagtggcggtgc |
| d_yakuba        | aatgtcgtgatta | ataattcat | aggcgacactt | aacagg-----ctgcaat | gattgcttaatt | aggggcggt | ----- | -taatcaagtggcggtgc |
| d_erecta        | aatgtcgtgatta | ataattcat | aggcgacactt | aacagg-----ctgcaat | gattgcttaatt | aggggcggt | ----- | -taatcaagtggcggtgc |
| d_ananassae     | -gtagcgtgatta | ataattcat | aggcgacactt | aacagg-----ctgcaat | gattgcttaatt | aggggcggt | ----- | -taatcaagtggcggtgc |
| d_pseudoobscura | cgtggcgtgattg | aaaattcat | aggcgacactt | aacagg-----ctgcaat | gattgcttaatt | aggggcggt | ----- | -taatcaagtggcggtgc |
| d_persimilis    | cgtggcgtgattg | aaaattcat | aggcgacactt | aacagg-----ctgcaat | gattgcttaatt | aggggcggt | ----- | -taatcaagtggcggtgc |
| d_willistoni    | -attgctgattg  | aaaattcat | aggcgacactt | aacagg-----ctgcaat | gattgcttaatt | aggggcggt | ----- | -taatcaagtggcggtgc |
| d_virilis       | -gattagtt-tta | aaaattcat | aggcgacactt | aacagg-----ctgcaat | gattgcttaatt | aggggcggt | ----- | -taatcaagtggcggtgc |
| d_mojavensis    | -atcctgtgatta | aaaattcat | aggcgacactt | aacagg-----ctgcaat | gattgcttaatt | aggggcggt | ----- | -taatcaagtggcggtgc |
| d_grimshawi     | -----tta      | aatatgcat | aggcgacactt | aacagg-----ctgcaat | gattgcttaatt | aggggcggt | ----- | -taatcaagtggcggtgc |
