# Supplementary material for: A Regulatory Code for Neuron-Specific Odor Receptor Expression
Source: PubMed Central journal article supplement (PMC2430909; doi:10.1371/journal.pbio.0060125), 2008-05-27

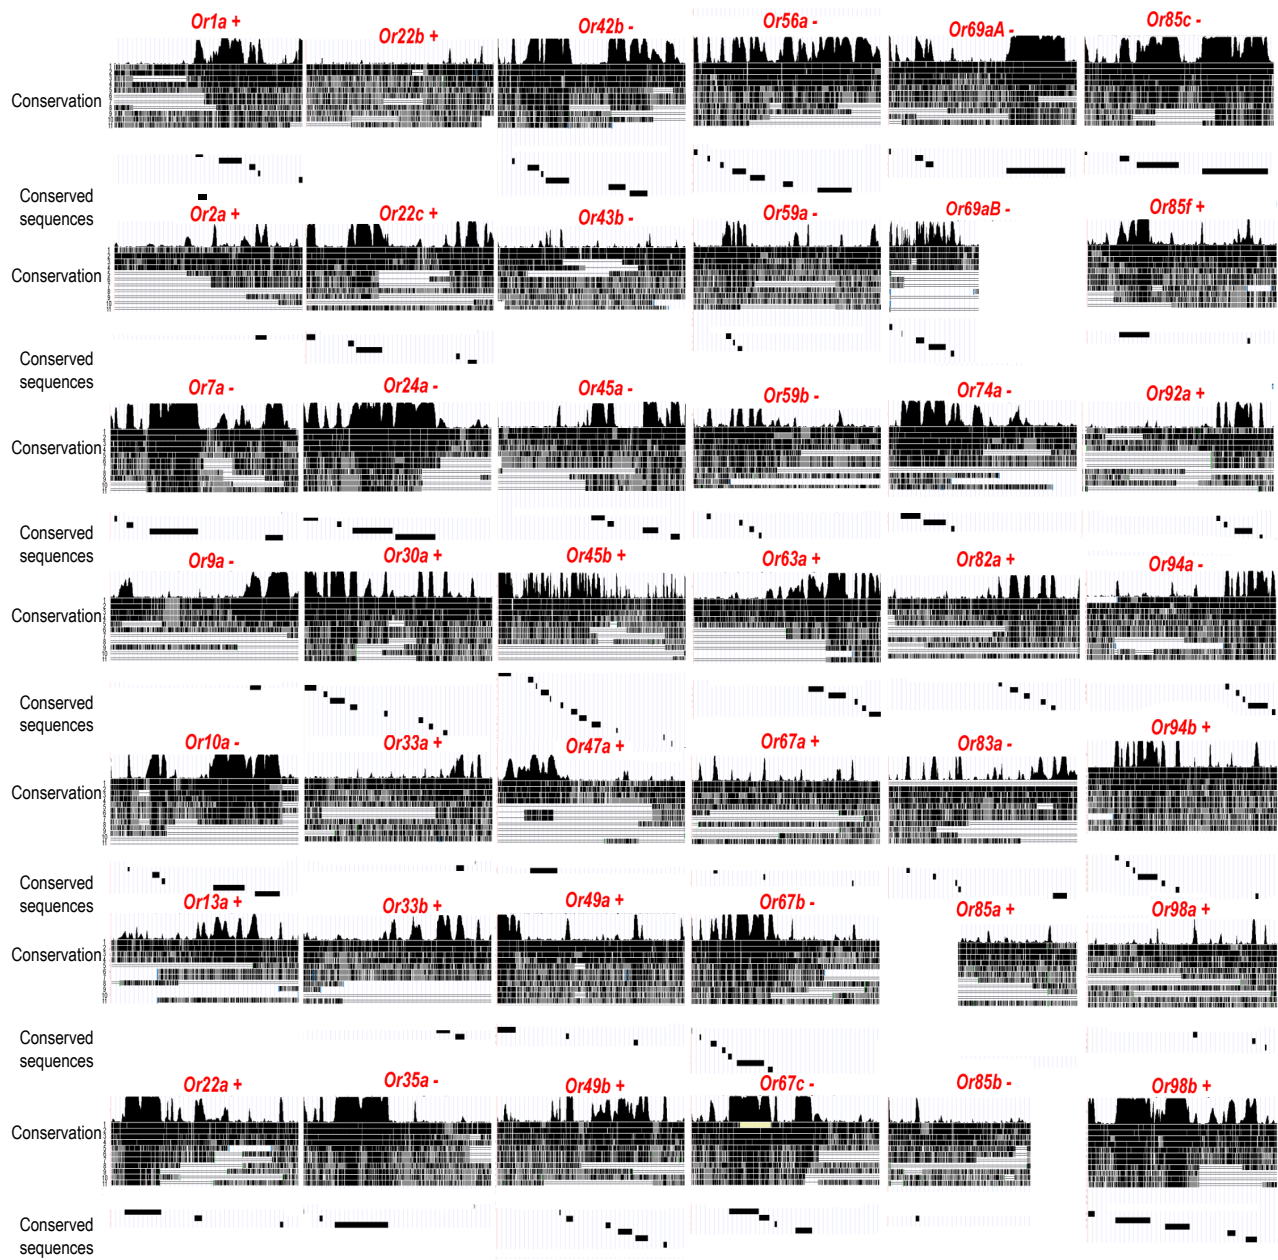

Supplement: pbio.0060125.sg005.pdf [file pbio.0060125.sg005.pdf]
